# Supplementary material for: Culturable Facultative Methylotrophic Bacteria from the Cactus Neobuxbaumia macrocephala Possess the Locus xoxF and Consume Methanol in the Presence of Ce3+ and Ca2+
Source: PubMed Central journal article supplement (PMC5606694; doi:10.1264/jsme2.me17070), 2017-09-27
Supplement: 32_244_s1.pdf [file 32_244_s1.pdf]

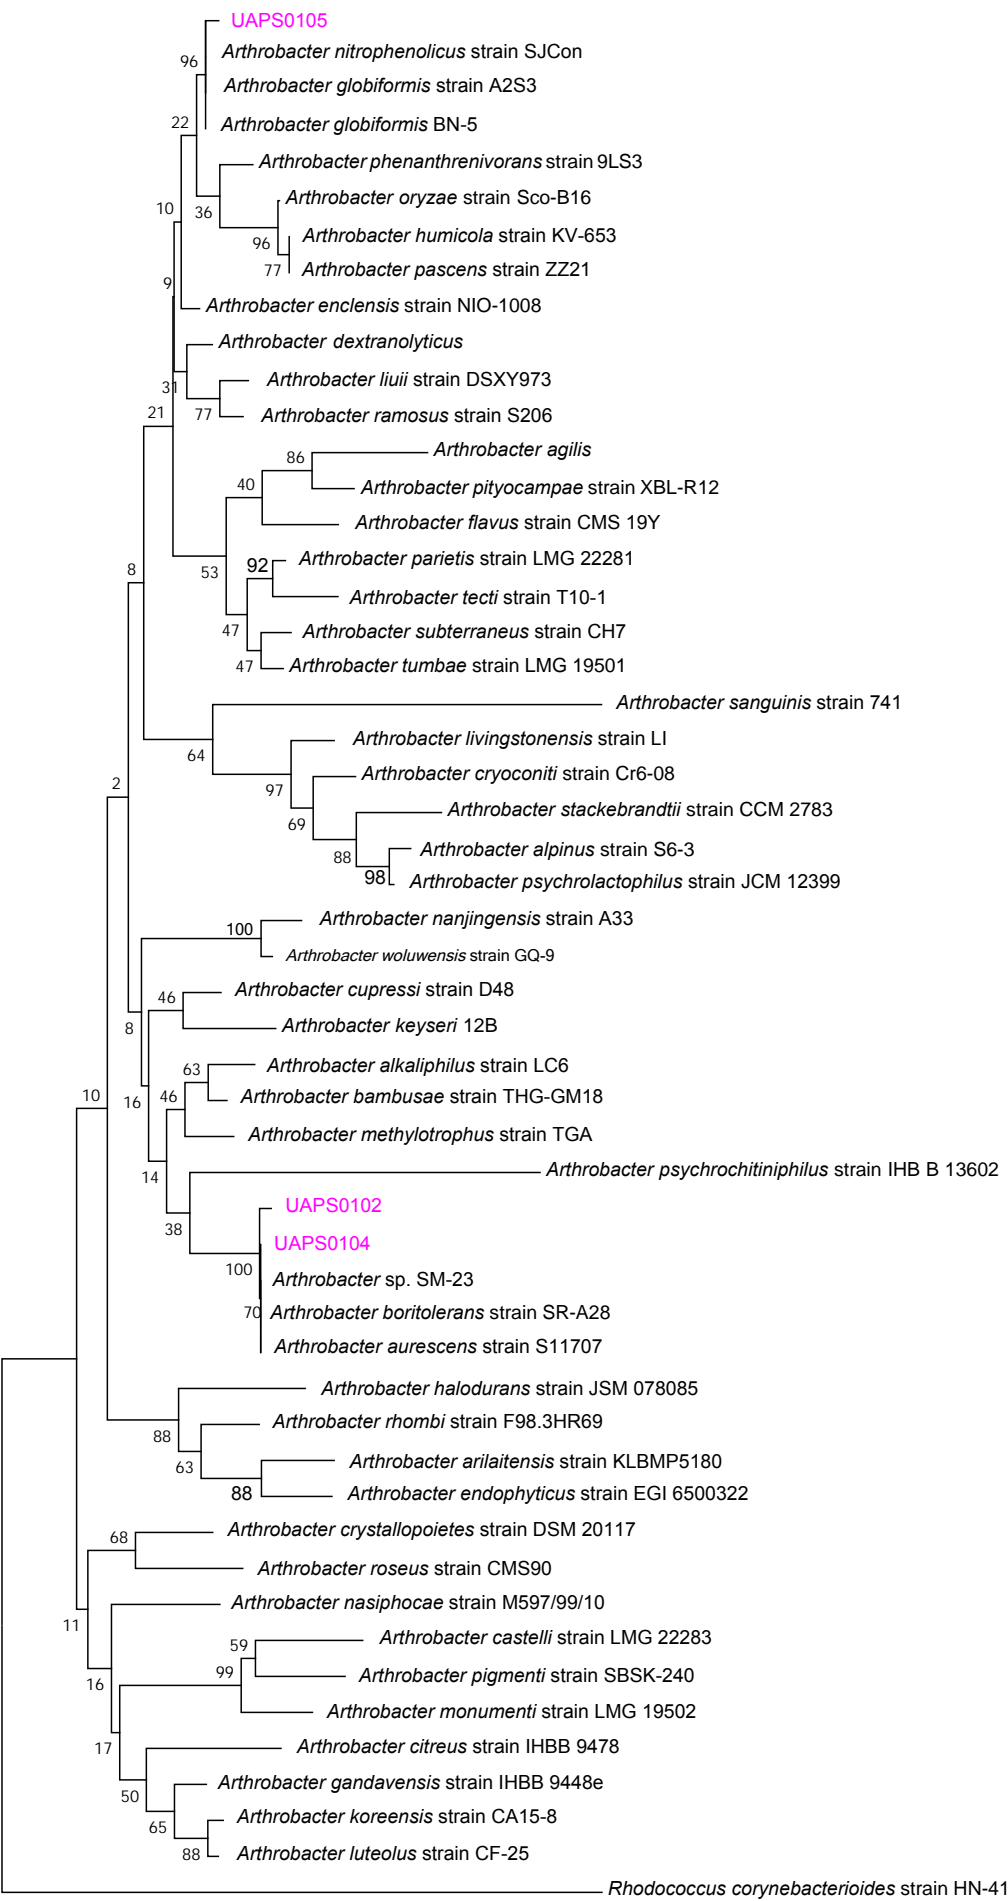

Fig. S1 % G'U bcba MW XybHmcZClass Actinobacteria gc UYg

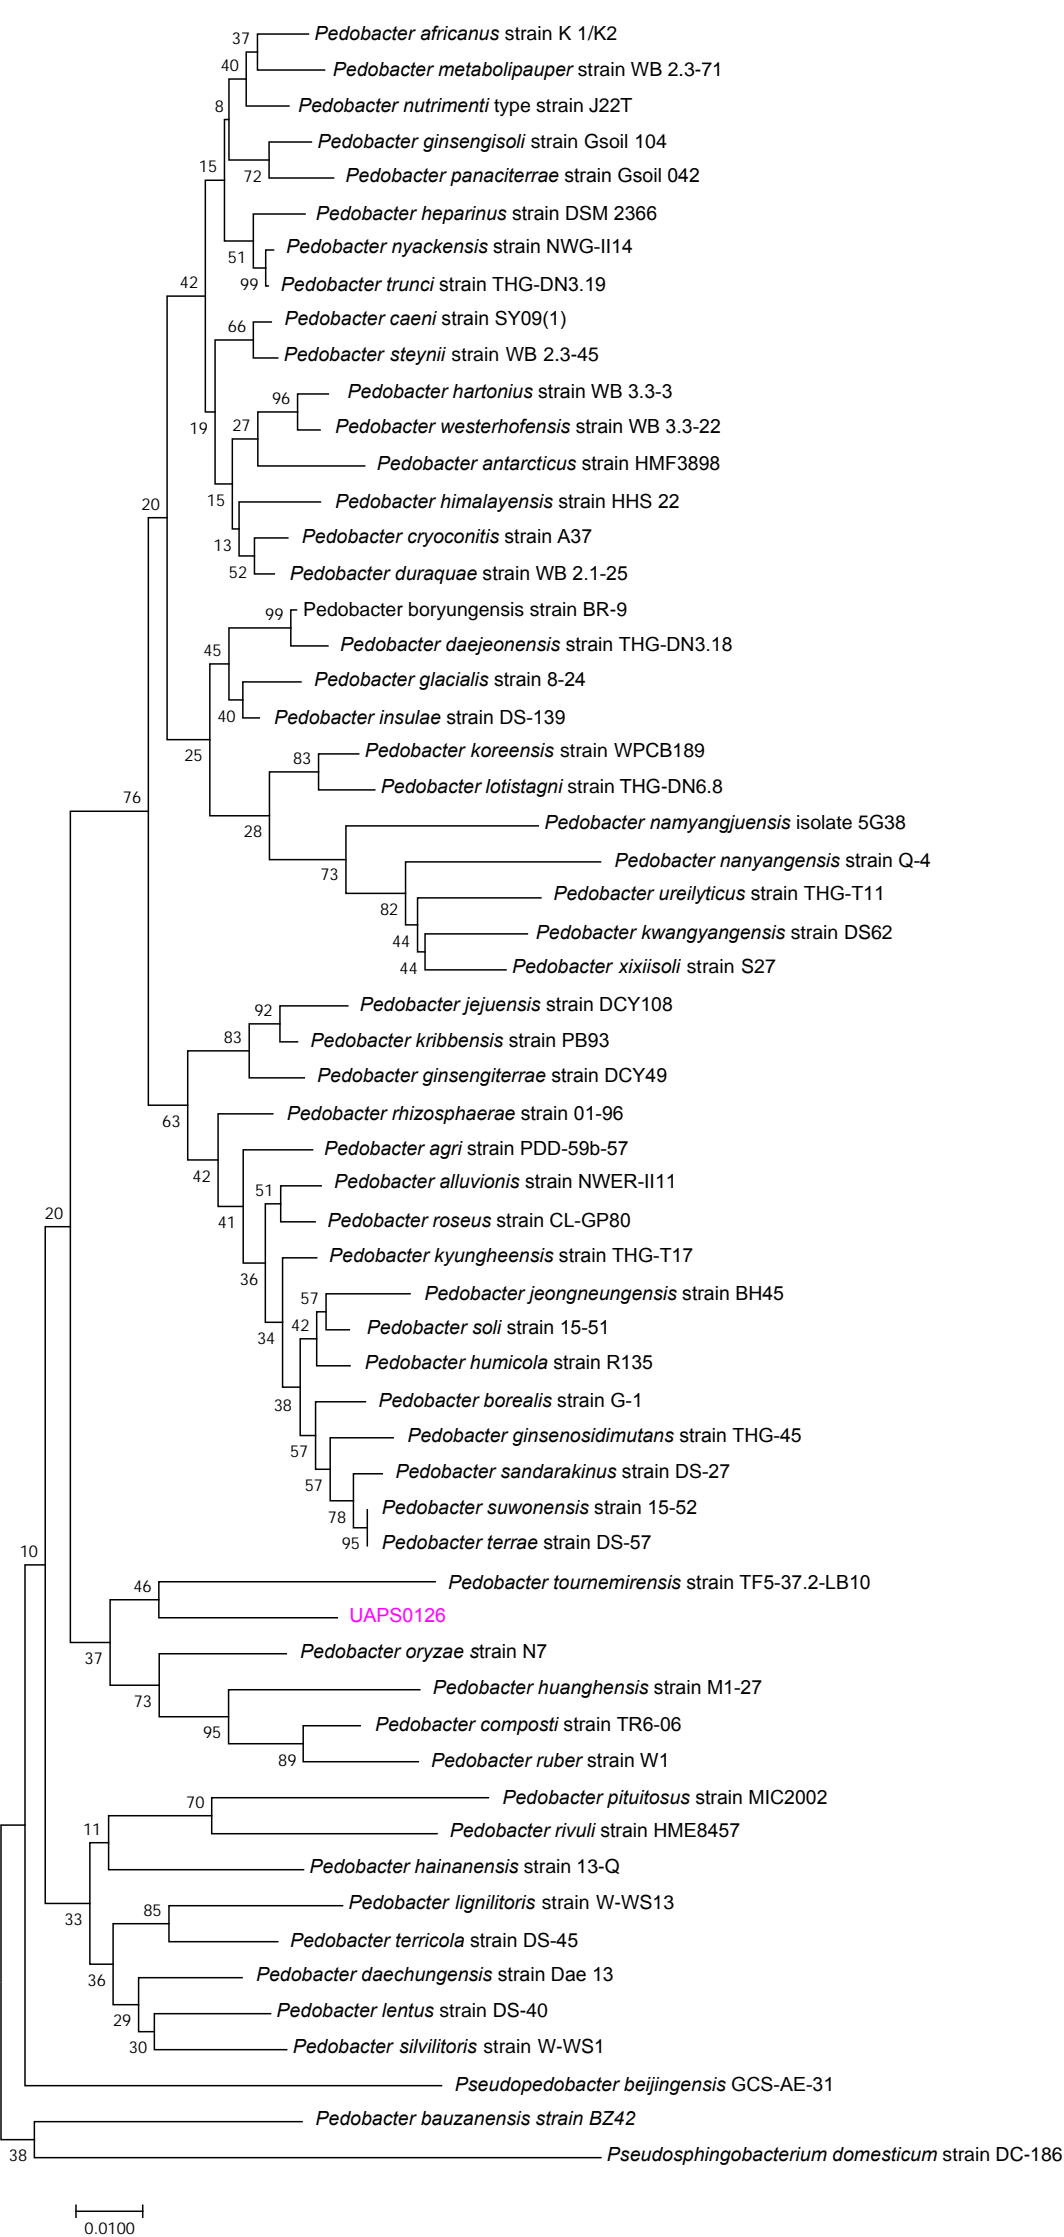

Fig. S1. 16S taxonomical identity of the Class *Sphingobacteriia* isolate

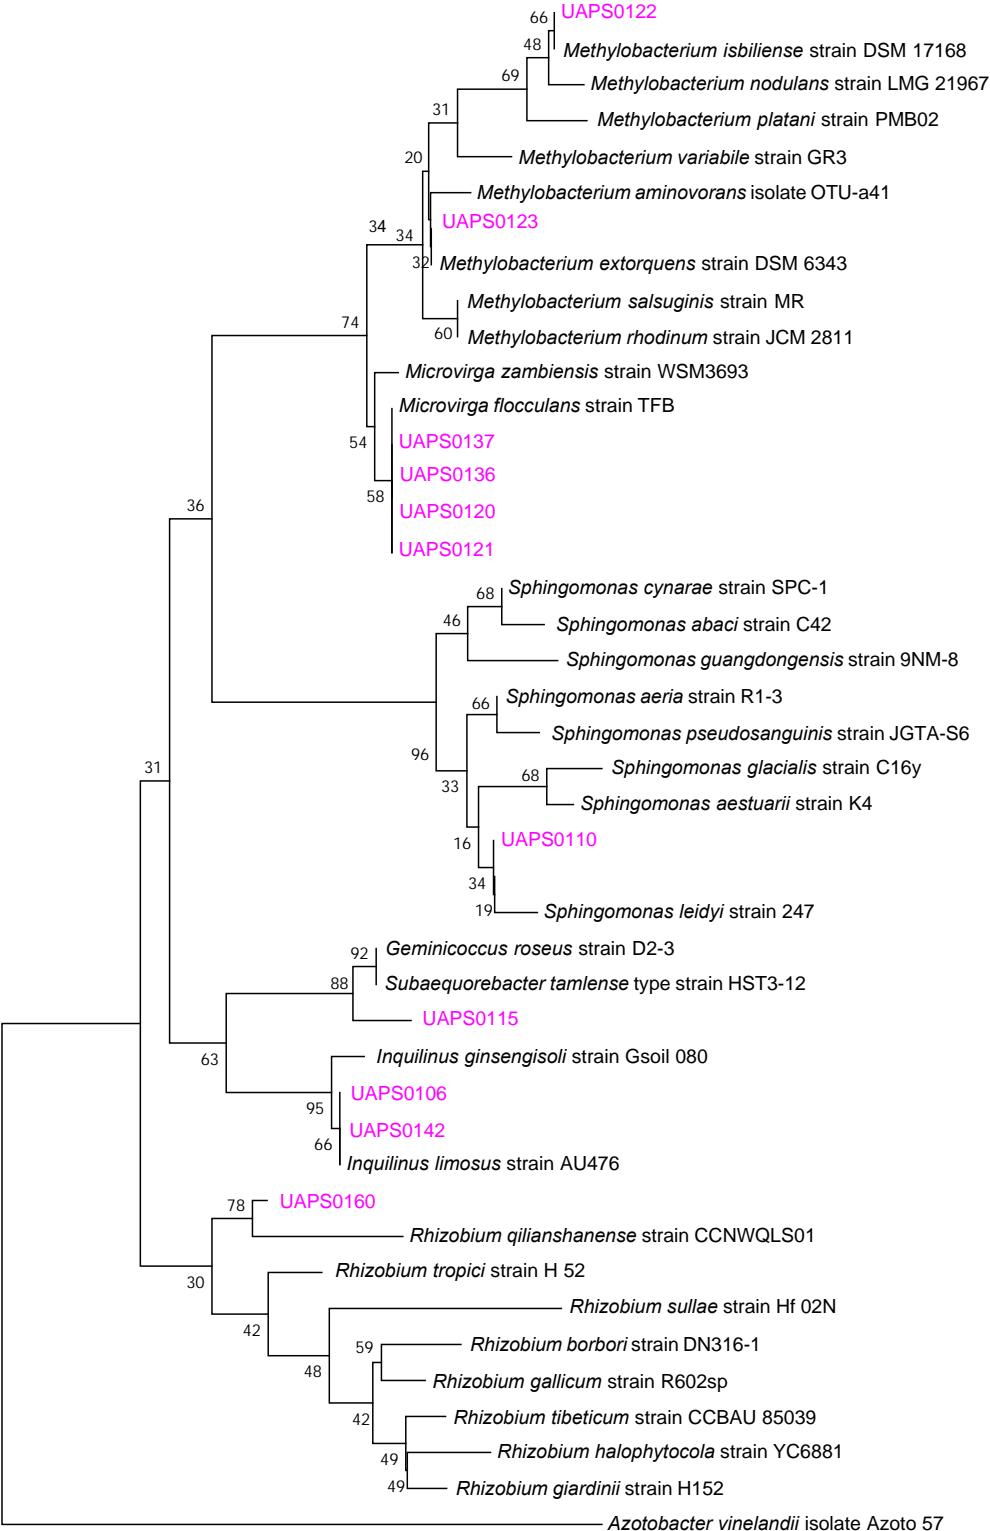

0.0100

Fig. S1. 16S taxonomical identity of Class *Alphaproteobacteria* isolates

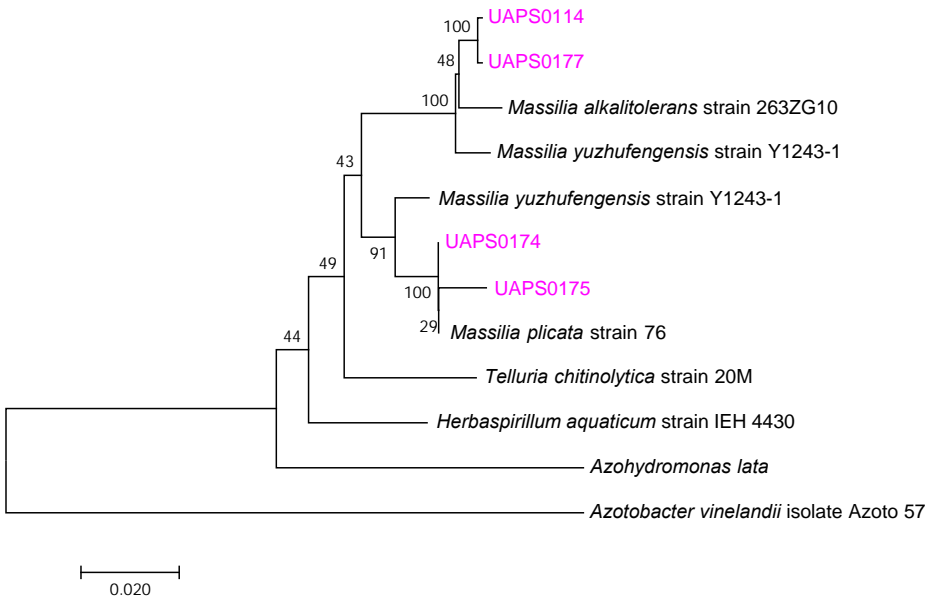

Fig. S1. Phylogenetic tree showing relationships between various bacterial strains. The tree is rooted at the bottom left. A scale bar at the bottom left indicates a distance of 0.020. The tree shows several clades with bootstrap values at the nodes. The clade containing UAPS0114 and UAPS0177 has a bootstrap value of 100. The clade containing *Massilia alkalitolerans* strain 263ZG10 and *Massilia yuzhufengensis* strain Y1243-1 has a bootstrap value of 100. The clade containing *Massilia yuzhufengensis* strain Y1243-1, UAPS0174, UAPS0175, and *Massilia plicata* strain 76 has a bootstrap value of 43. The clade containing UAPS0174 and UAPS0175 has a bootstrap value of 91. The clade containing UAPS0175 and *Massilia plicata* strain 76 has a bootstrap value of 100. The clade containing *Massilia plicata* strain 76, *Telluria chitinolytica* strain 20M, and *Herbaspirillum aquaticum* strain IEH 4430 has a bootstrap value of 29. The clade containing *Telluria chitinolytica* strain 20M and *Herbaspirillum aquaticum* strain IEH 4430 has a bootstrap value of 49. The clade containing *Herbaspirillum aquaticum* strain IEH 4430 and *Azohydromonas lata* has a bootstrap value of 44. The clade containing *Azohydromonas lata* and *Azotobacter vinelandii* isolate Azoto 57 has a bootstrap value of 44. The clade containing *Azotobacter vinelandii* isolate Azoto 57 and the other clades has a bootstrap value of 44.

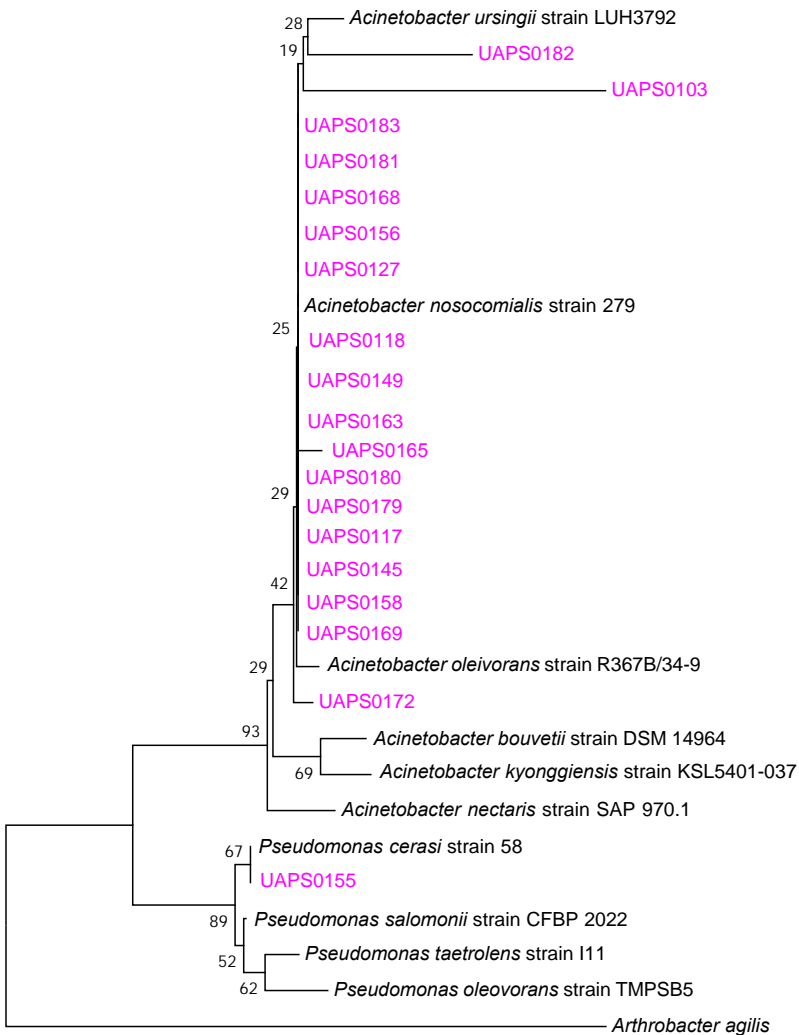

0.020

**Fig. S1. 16S taxonomical identity of Class *Gammaproteobacteria* isolates**

### *mxoF* DOT BLOT ARRANGMENT

|    |       |    |    |    |
|----|-------|----|----|----|
| C+ | blank | 77 | 75 | 74 |
| 72 | Ni    | 69 | 68 | Ni |
| 63 | 60    | 58 | 56 | 55 |
| 49 | 45    | 42 | Ni | 23 |
| 22 | 21    | 18 | 17 | 15 |
| 14 | Ni    | 10 | 06 | C- |

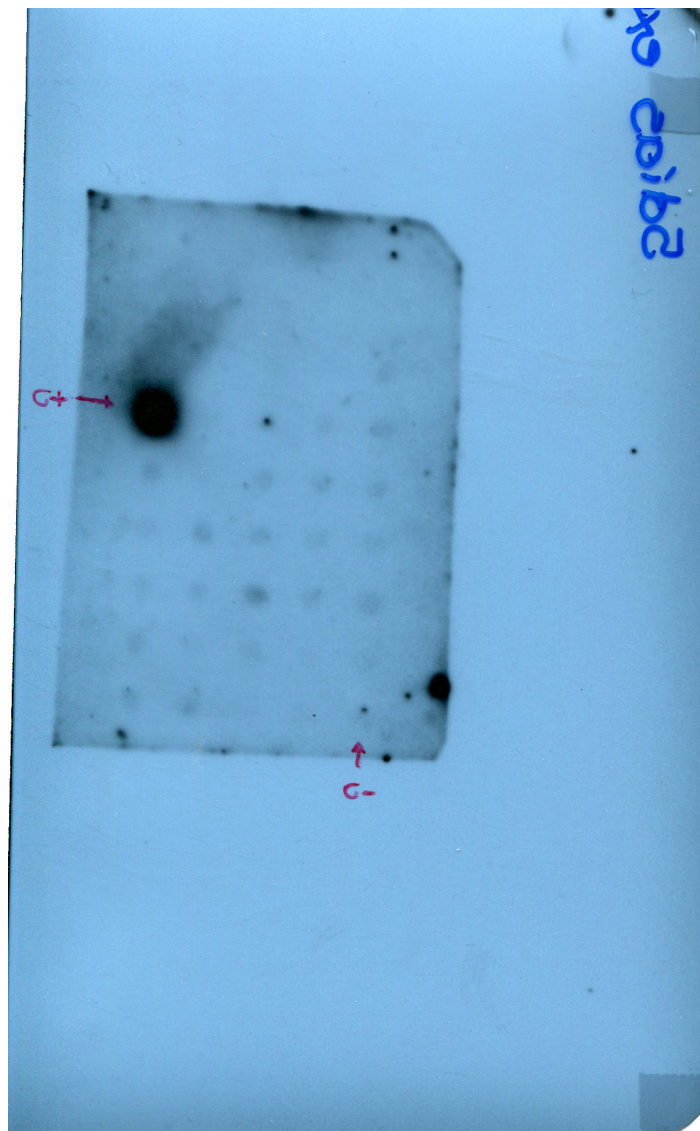

Positive control **C+** *Methylobacterium extorquens* JCM2802.

Negative control **C-** *U. maydis* 207.

Numbers indicate the reduced name of the isolates. For example, 77 means UAPS07077.

**Ni**, strain not included in this work.

**Fig. S2. *mxoF* dot blot hybridization**

**Table S1. Methanol:NDMA (N,N'-dimethyl-4-nitrosoaniline oxidoreductase primers.**

---

| Primer     | Sequence (5'-3')              |
|------------|-------------------------------|
| NDMAY270F  | YCC CAA GGA CTA CAA CGT CAT   |
| NDMAGA270F | CCA AGG ACT ACA ACG TCA TGG A |
| NDMA270F   | CCC AAG GAC TAC AAC GTC AT    |
| NDMA850R   | CCS AGN CCR CCS GAG TTG AA    |

---
